# Supplementary material for: Towards the development of an effective in vivo wound healing agent from Bacillus sp. derived biosurfactant using Catla catla fish fat
Source: Royal Society of Chemistry journal article supplement (doi:10.1039/c6ra26904d), 2017-01-01
Supplement: c6ra26904d1.pdf [file c6ra26904d1.pdf]

## Supplementary material

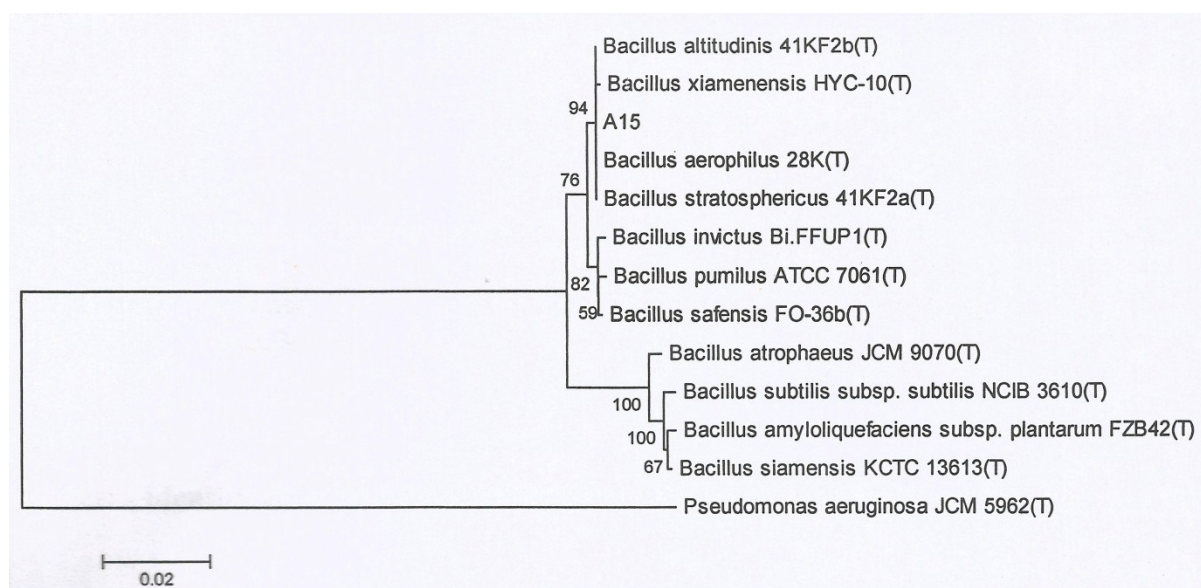

**Fig. S1** Phylogenetic tree based on 16S rRNA gene sequence, showing the phylogenetic relationship between the isolated strain with other members of the *Bacillus* genus.

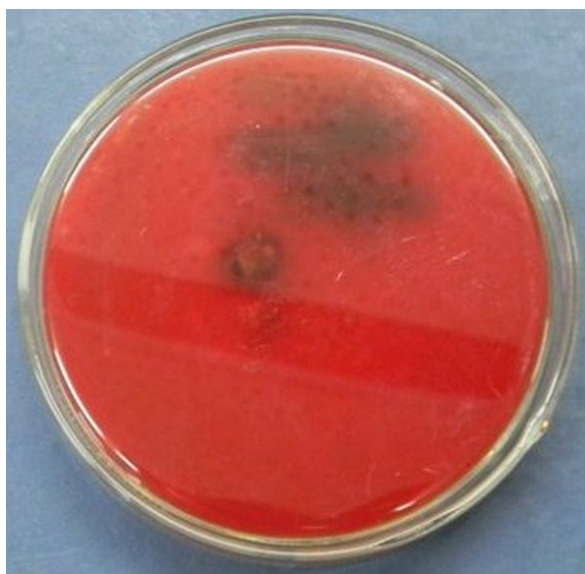

**Fig. S2** Haemolytic activity of *Bacillus stratosphericus* A15 culture on blood agar media.

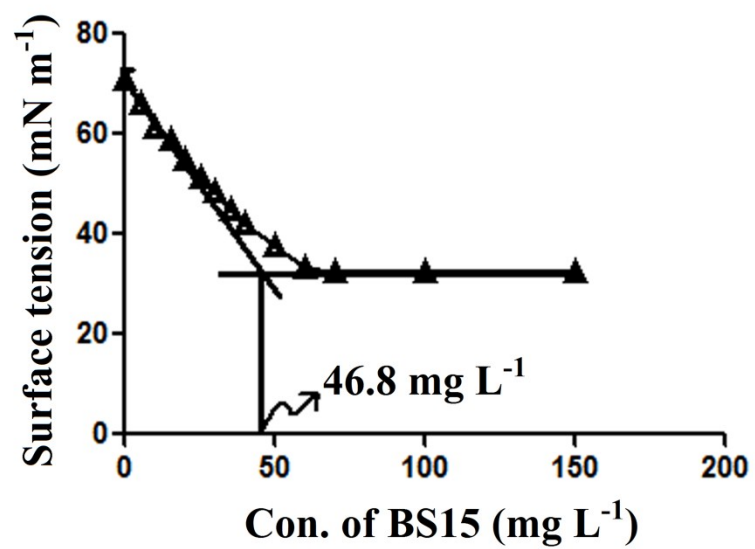

**Fig. S3** ST versus concentration profile of BS15.
